# Supplementary material
Source: PubMed Central journal article supplement (PMC4149901)

# Ovyp1 expression levels

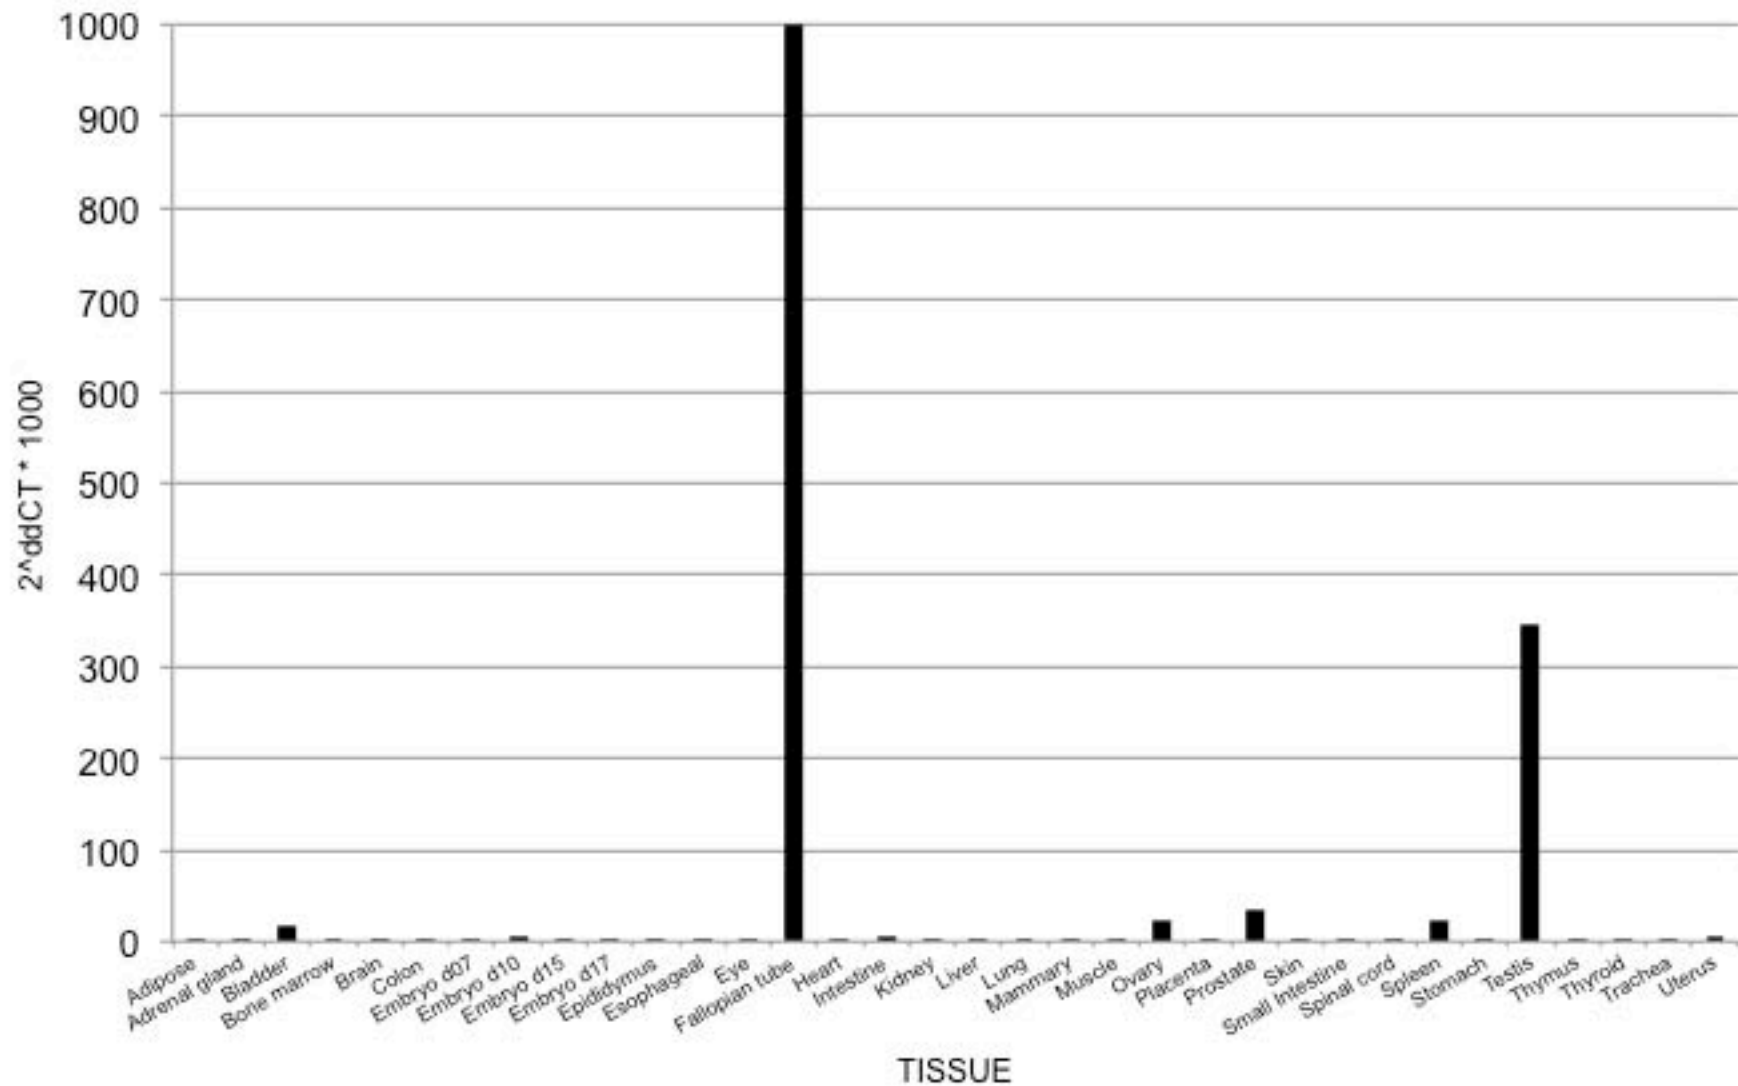

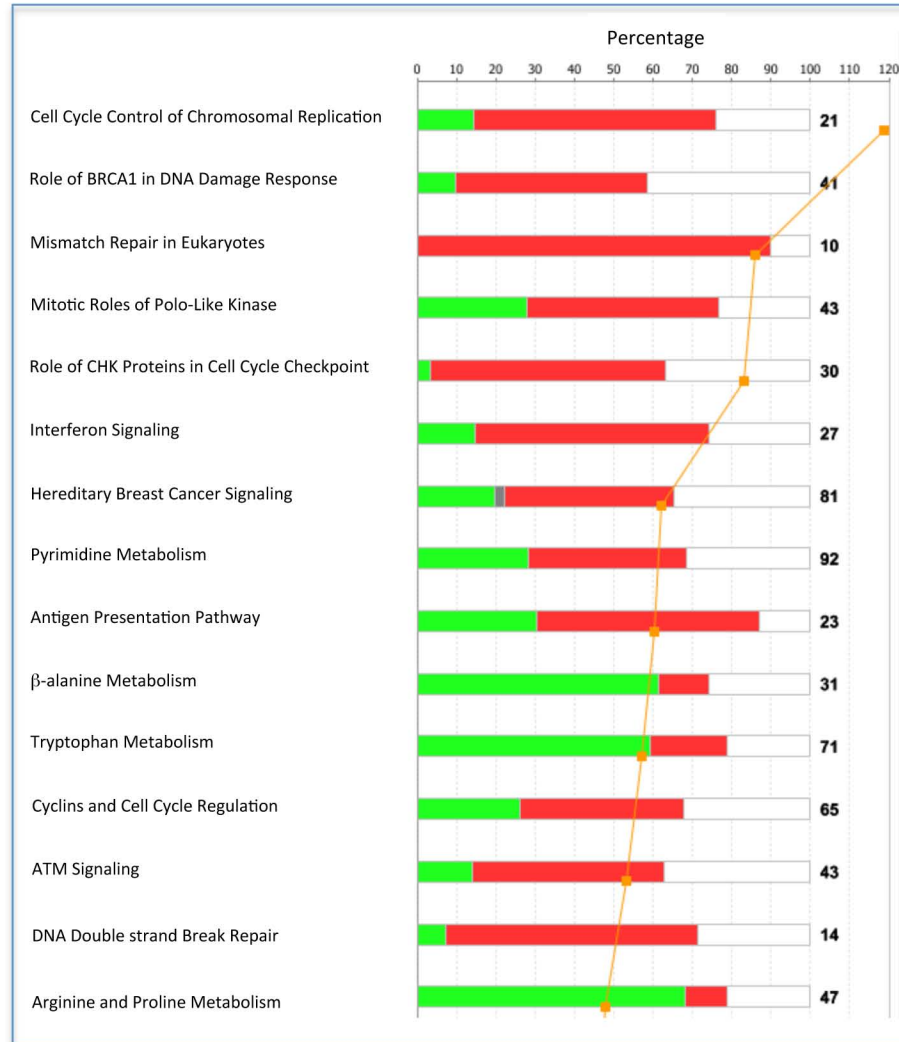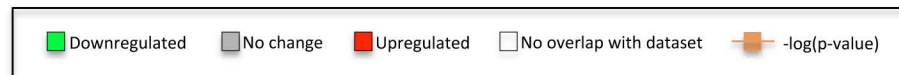

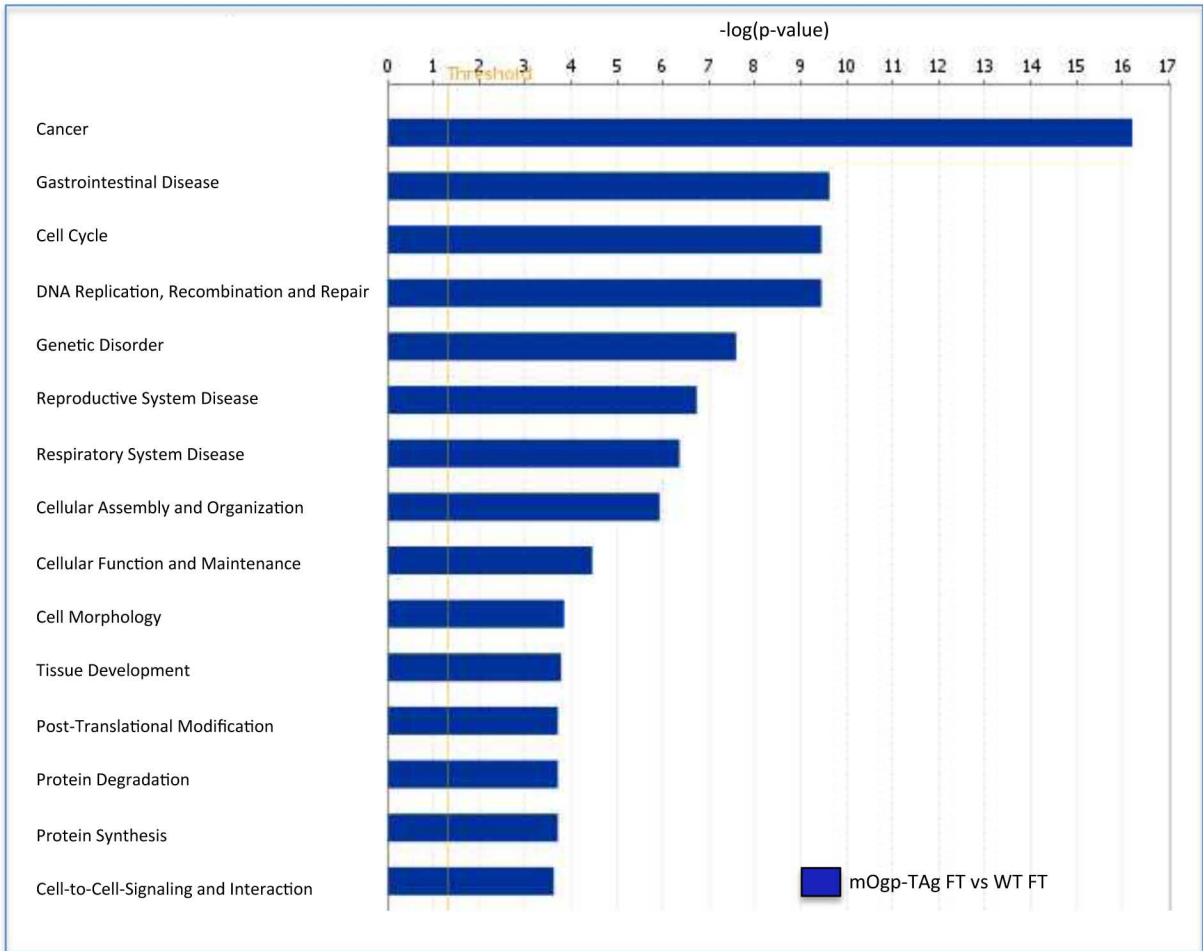

Nucleus

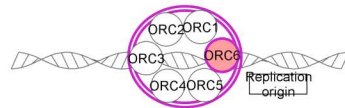

Pre-Replication Complex is assembled at each origin of replication in the G1 phase of the cell cycle

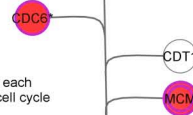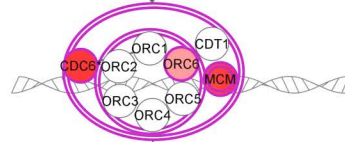

CDC45 and RPA are required at the G1-S phase transition

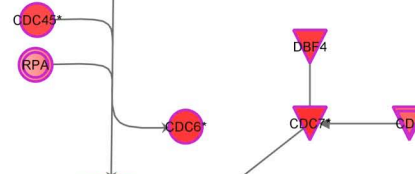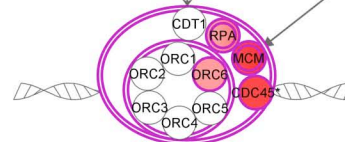

Replicative Complex is activated in the S phase

DNA Pol

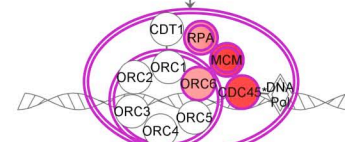

DNA replication

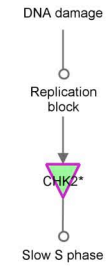

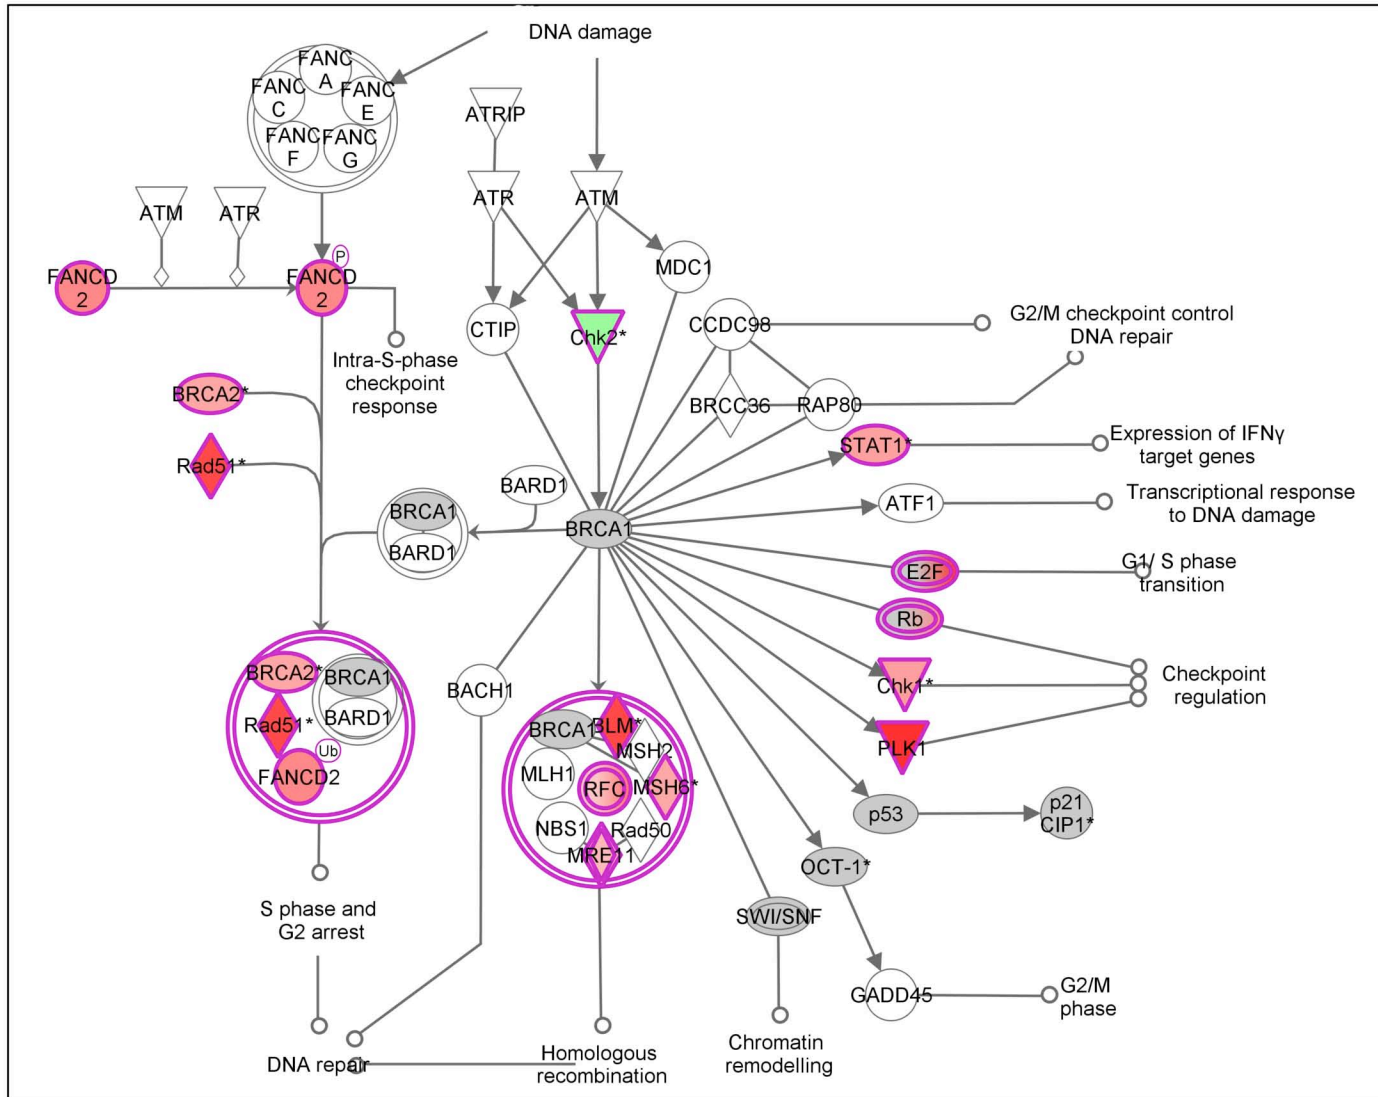

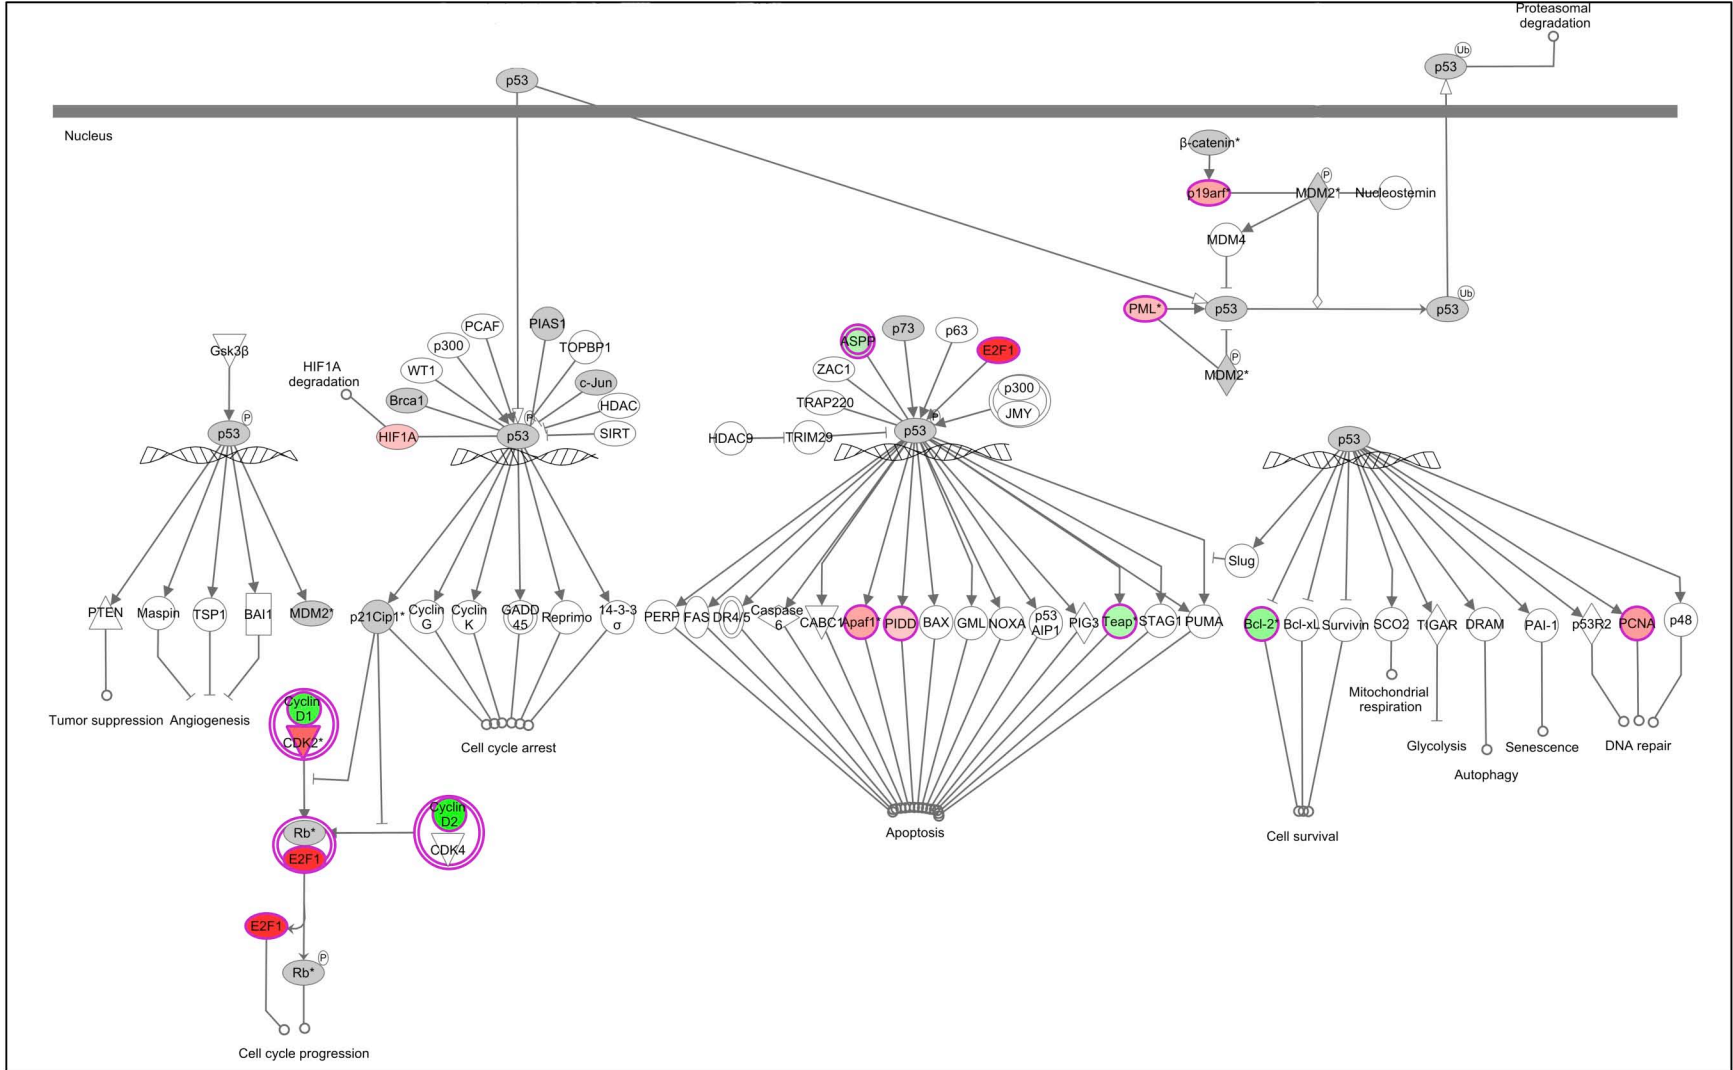

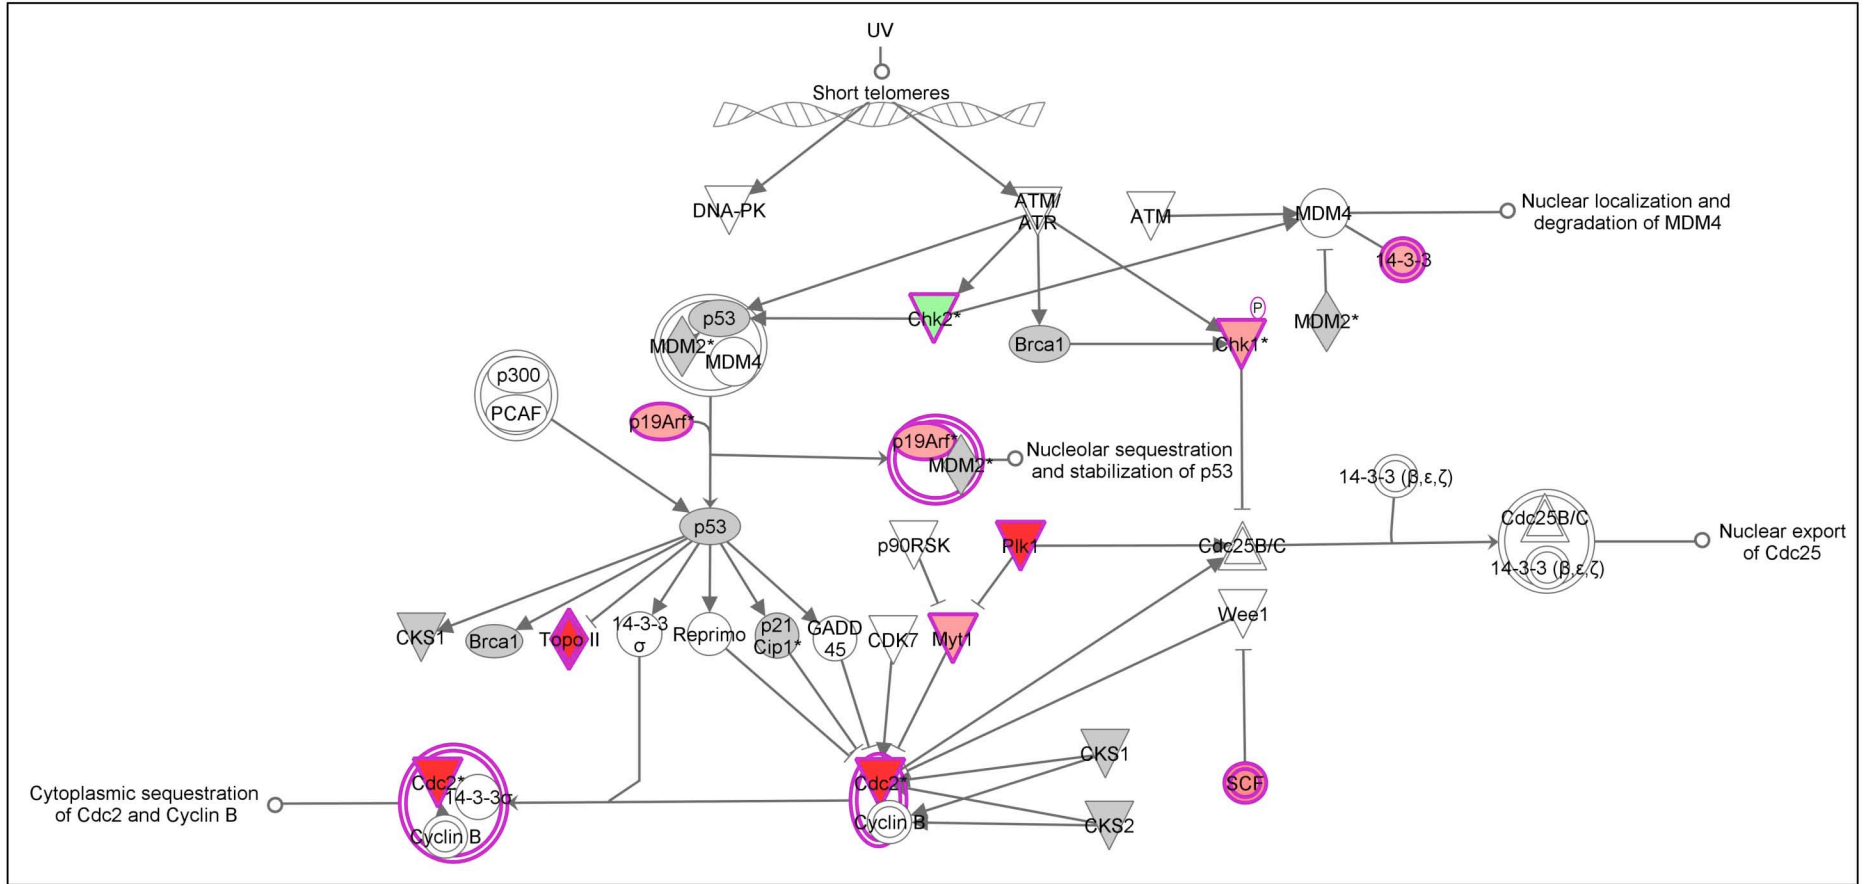

Supplement: NIHMS577834-supplement-Supp_Fig_S1-S7.pdf [file NIHMS577834-supplement-Supp_Fig_S1-S7.pdf]
